# Supplementary material for: Exploring the influence of the cation type and polymer support in bis(fluorosulfonyl)imide-based plastic crystal composite membranes for CO2/N2 separation
Source: Royal Society of Chemistry journal article supplement (doi:10.1039/d1ta07831c), 2021-01-01
Supplement: d1ta07831c1.pdf [file d1ta07831c1.pdf]

## Supporting Information

# Exploring the influence of the cation type and polymer support in bis(fluorosulfonyl)imide-based plastic crystal composite membranes for CO<sub>2</sub>/N<sub>2</sub> separation

Fernando Ramos,<sup>a</sup> Yady Garcia,<sup>a</sup> Colin Kang,<sup>a</sup> Luke O'Dell,<sup>a</sup> Maria Forsyth,<sup>a</sup> and Jennifer M. Pringle<sup>\*a</sup>

### Thermal analysis

**Table S1.** Thermal data of the neat polymers (PVDF and PEO) and the neat OIPCs ([C<sub>2</sub>mpyr][FSI], [P<sub>1222</sub>][FSI], [HMG][FSI], [N<sub>1111</sub>][FSI], [N<sub>111CN</sub>][FSI]), plus their co-cast composites at different ratios of study (80:20 and 50:50).

|                                     | phase III-II |                              | phase II-I  |                              | Polymer or combined OIPC/polymer melting |                              | OIPC melting |                              |
|-------------------------------------|--------------|------------------------------|-------------|------------------------------|------------------------------------------|------------------------------|--------------|------------------------------|
|                                     | T [°C] ±1°C  | ΔH [J g <sup>-1</sup> ] ±10% | T [°C] ±1°C | ΔH [J g <sup>-1</sup> ] ±10% | T [°C] ±1°C                              | ΔH [J g <sup>-1</sup> ] ±10% | T [°C] ±1°C  | ΔH [J g <sup>-1</sup> ] ±10% |
| PVDF                                | -            | -                            | -           | -                            | 160                                      | 33.9                         | -            | -                            |
| PEO                                 | -            | -                            | -           | -                            | 70                                       | 126.6                        | -            | -                            |
| [C <sub>2</sub> mpyr][FSI]          | -66          | 33.0                         | -15         | 3.7                          | -                                        | -                            | 203          | 25.3                         |
| 80[C <sub>2</sub> mpyr][FSI]-20PVDF | -66          | 25.1                         | -16         | 1.9                          | 140                                      | 10.1                         | 198          | 7.1                          |
| 50[C <sub>2</sub> mpyr][FSI]-50PVDF | -66          | 14.3                         | -15         | 0.9                          | 143                                      | 26.2                         | -            | -                            |
| 80[C <sub>2</sub> mpyr][FSI]-20PEO  | -61          | 24.0                         | -14         | 1.8                          | 62                                       | 24.6                         | 203          | 8.4                          |
| 50[C <sub>2</sub> mpyr][FSI]-50PEO  | -64          | 6.0                          | -14         | 0.6                          | 62                                       | 72.6                         | -            | -                            |
| [P <sub>1222</sub> ][FSI]           | -            | -                            | -52         | 29.4                         | -                                        | -                            | 47           | 23.4                         |
| 80[P <sub>1222</sub> ][FSI]-20PVDF  | -            | -                            | -55         | 6.6                          | 122                                      | 12.0                         | 47           | 12.0                         |
| 50[P <sub>1222</sub> ][FSI]-50PVDF  | -            | -                            | -53         | 1.2                          | 142                                      | 28.8                         | 48           | 1.8                          |
| 80[P <sub>1222</sub> ][FSI]-20PEO   | -            | -                            | -51         | 20.4                         | 53                                       | 42.0                         | -            | -                            |
| 50[P <sub>1222</sub> ][FSI]-50PEO   | -            | -                            | -52         | 1.2                          | 61                                       | 67.2                         | -            | -                            |
| [HMG][FSI]                          | 10           | 31.2                         | 67          | 37.8                         | -                                        | -                            | 88           | 6.6                          |
| 80[HMG][FSI]-20PVDF                 | 10           | 0.6                          | 68          | 22.2                         | 115                                      | 9.0                          | 85           | 2.4                          |
| 50[HMG][FSI]-50PVDF                 | 11           | 1.2                          | 68          | 9                            | 132                                      | 25.2                         | 86           | 0.6                          |
| 80[HMG][FSI]-20PEO                  | -            | -                            | -           | -                            | 62                                       | 62.4                         | -            | -                            |
| 50[HMG][FSI]-50PEO                  | -            | -                            | -           | -                            | 70                                       | 101.4                        | -            | -                            |
| [N <sub>1111</sub> ][FSI]           | -            | -                            | 76          | 51.6                         | -                                        | -                            | 311          | 39.0                         |
| 80[N <sub>1111</sub> ][FSI]-20PVDF  | -            | -                            | 77          | 43.2                         | 158                                      | 13.8                         | n/a          | n/a                          |
| 50[N <sub>1111</sub> ][FSI]-50PVDF  | -            | -                            | 77          | 21.0                         | 160                                      | 36.6                         | n/a          | n/a                          |
| 80[N <sub>1111</sub> ][FSI]-20PEO   | -            | -                            | 78          | 43.2                         | 61                                       | 32.4                         | n/a          | n/a                          |
| 50[N <sub>1111</sub> ][FSI]-50PEO   | -            | -                            | 77          | 19.2                         | 64                                       | 71.4                         | n/a          | n/a                          |
| [N <sub>111CN</sub> ][FSI]          | -            | -                            | -66         | 4.2                          | -                                        | -                            | 100          | 74.4                         |
| 80[N <sub>111CN</sub> ][FSI]-20PVDF | -            | -                            | -65         | 3.0                          | 165                                      | 12.0                         | 103          | 49.8                         |
| 50[N <sub>111CN</sub> ][FSI]-50PVDF | -            | -                            | -           | -                            | 167                                      | 40.8                         | 96           | 24.6                         |
| 80[N <sub>111CN</sub> ][FSI]-20PEO  | -            | -                            | -65         | 3.0                          | 53                                       | 26.6                         | 101          | 43.2                         |
| 50[N <sub>111CN</sub> ][FSI]-50PEO  | -            | -                            | -66         | 1.8                          | 51                                       | 66.6                         | 82.4         | 9.0                          |

### Polarised optical microscopy

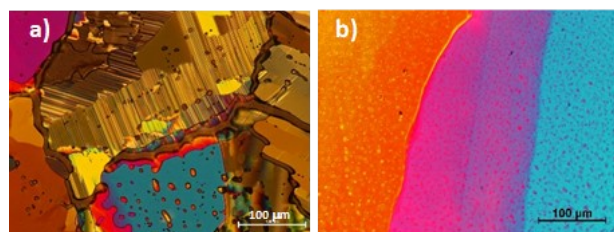

**Figure S1:** Polarized optical micrographs taken at 200x magnification at room temperature after melt and recrystallization on a microscope slide in a hot stage (cooling rate  $10\text{ }^{\circ}\text{C min}^{-1}$ ) of a) neat [HMG][FSI], and b) neat [P<sub>1222</sub>][FSI].

## Gas permeability-selectivity

**Table S2.** CO<sub>2</sub> and N<sub>2</sub> permeability and selectivity of the neat polymers and the OIPC/polymer composites at 35 and 75 °C.

| OIPC                            | Polymer (wt%) | T (K) | P <sub>CO2</sub> | P <sub>N2</sub> | α <sub>CO2/N2</sub> |
|---------------------------------|---------------|-------|------------------|-----------------|---------------------|
| -                               | 100 PVDF      | 308   | 0.7 ± 0.3        | 0.02 ± 0.003    | 31 ± 15.8           |
|                                 |               | 348   | 3 ± 0.1          | 0.4 ± 0.08      | 7 ± 0.7             |
| -                               | 100 PEO       | 308   | 118 ± 0.5        | 4.6 ± 1.36      | 26 ± 8.8            |
| <b>[C<sub>2</sub>mpyr][FSI]</b> | 20 PVDF       | 308   | 57 ± 5.8         | 1.3 ± 0.13      | 43 ± 1.3            |
|                                 |               | 348   | 95 ± 9.2         | 5.5 ± 0.50      | 17 ± 2.7            |
|                                 | 50 PVDF       | 308   | 63 ± 14.1        | 4.4 ± 1.95      | 14 ± 7.0            |
|                                 |               | 348   | 75 ± 2.2         | 6.4 ± 0.37      | 12 ± 1.2            |
|                                 | 20 PEO        | 308   | 47 ± 1.6         | 1.4 ± 0.01      | 33 ± 7.6            |
|                                 | 50 PEO        | 308   | 54 ± 7.5         | 2.3 ± 0.01      | 23 ± 3.3            |
| <b>[P<sub>1222</sub>][FSI]</b>  | 20 PVDF       | 308   | 100 ± 8.3        | 3.6 ± 0.08      | 28 ± 2.3            |
|                                 |               | 348   | 351 ± 51.1       | 21.8 ± 1.89     | 16 ± 1.0            |
|                                 | 50 PVDF       | 308   | 361 ± 5.0        | 12.4 ± 0.55     | 29 ± 1.2            |
|                                 |               | 348   | 479 ± 6.8        | 36.9 ± 0.51     | 13 ± 0.0            |
|                                 | 80 PEO        | 308   | N/A              | N/A             | N/A                 |
|                                 | 50 PEO        | 308   | 38 ± 3.2         | 2.1 ± 0.77      | 17 ± 6.0            |
| <b>[HMG][FSI]</b>               | 20 PVDF       | 308   | 12 ± 1.7         | 0.4 ± 0.14      | 29 ± 5.6            |
|                                 |               | 348   | 504 ± 59.0       | 40.6 ± 4.74     | 12 ± 2.7            |
|                                 | 50 PVDF       | 308   | 16 ± 7.7         | 0.6 ± 0.03      | 26 ± 11.1           |
|                                 |               | 348   | 279 ± 22.9       | 21.3 ± 1.07     | 13 ± 1.8            |
|                                 | 20 PEO        | 308   | 3 ± 0.4          | 0.5 ± 0.66      | 5 ± 7.6             |
|                                 | 50 PEO        | 308   | 14 ± 0.7         | 6.8 ± 2.80      | 2 ± 1.3             |
| <b>[N<sub>1111</sub>][FSI]</b>  | 20 PVDF       | 308   | 1.6 ± 0.0        | 0.4 ± 0.02      | 4 ± 0.2             |
|                                 |               | 348   | 57 ± 0.9         | 4.9 ± 0.08      | 11 ± 0.5            |
|                                 | 50 PVDF       | 308   | 2 ± 1.7          | 0.9 ± 0.23      | 3 ± 1.6             |
|                                 |               | 348   | 29 ± 1.3         | 4.5 ± 0.21      | 6 ± 0.5             |
|                                 | 20 PEO        | 308   | N/A              | N/A             | N/A                 |
|                                 | 50 PEO        | 308   | 6 ± 2.4          | 0.5 ± 0.21      | 13 ± 2.8            |
| <b>[N<sub>111CN</sub>][FSI]</b> | 20 PVDF       | 308   | N/A              | N/A             | N/A                 |
|                                 |               | 348   | N/A              | N/A             | N/A                 |
|                                 | 50 PVDF       | 308   | 5 ± 1.5          | 0.9 ± 0.11      | 6 ± 1.8             |
|                                 |               | 348   | 2 ± 0.2          | 1.9 ± 0.36      | 1 ± 1.0             |
|                                 | 20 PEO        | 308   | 2 ± 0.6          | 0.7 ± 0.09      | 2 ± 0.5             |
|                                 | 50 PEO        | 308   | N/A              | N/A             | N/A                 |

## Synchrotron powder X-ray diffraction

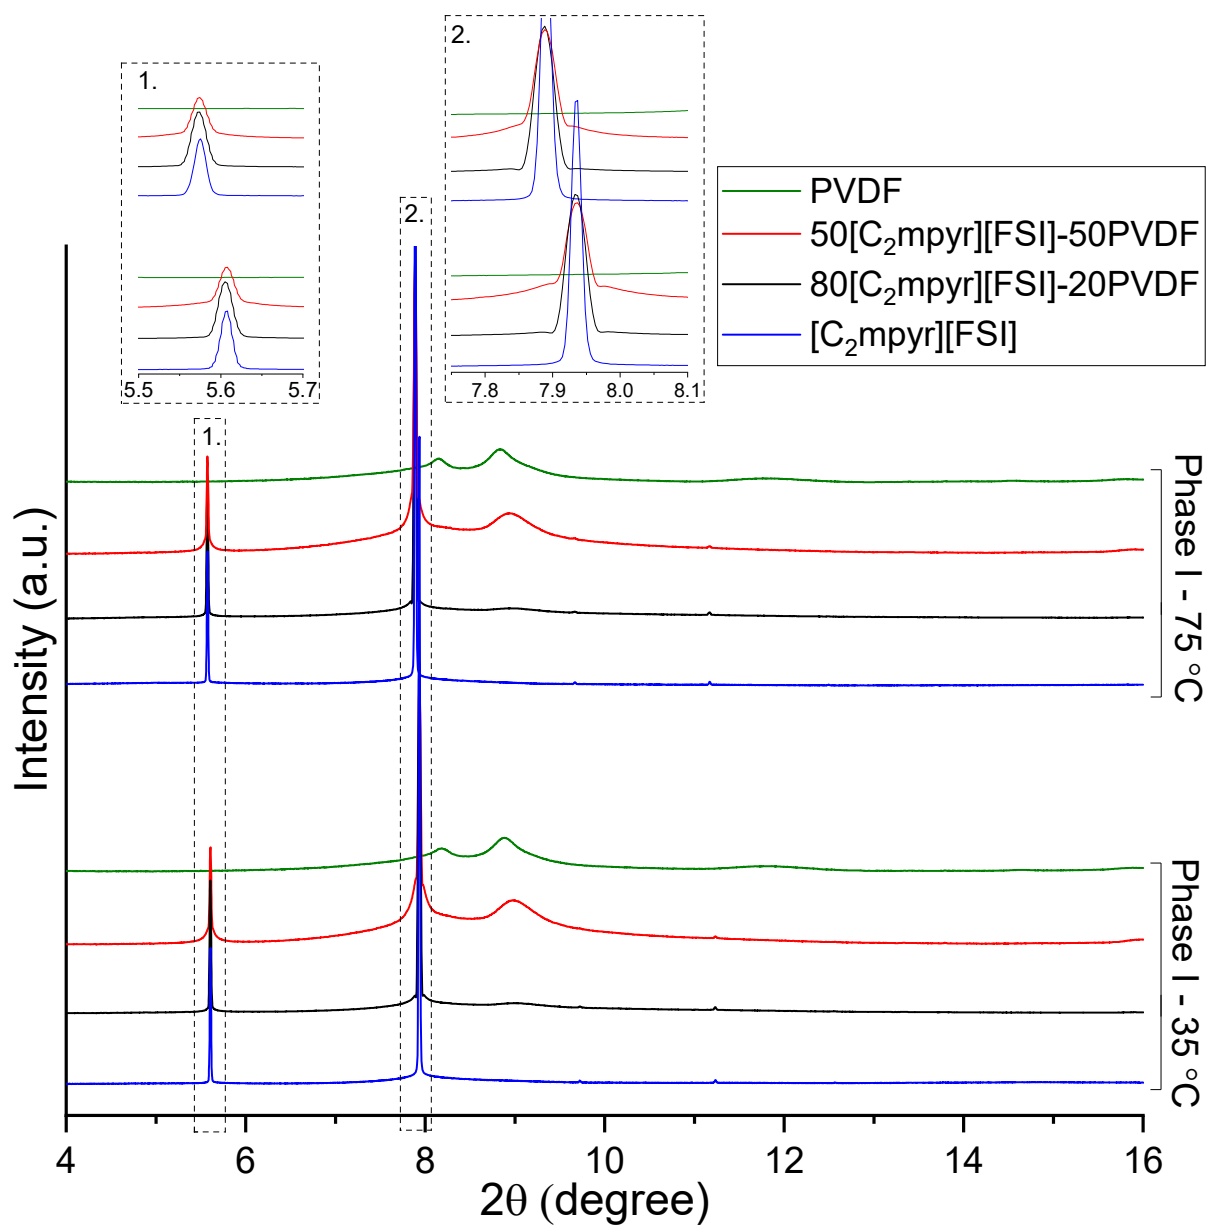

**Figure S2:** Synchrotron powder XRD patterns collected at 35 and 75 °C ( $\lambda = 0.6882361(4) \text{ \AA}$ ) for neat [C<sub>2</sub>mpyr][FSI] (blue), neat PVDF (green) and the composites 80[C<sub>2</sub>mpyr][FSI]:20PVDF (black), and 50[C<sub>2</sub>mpyr][FSI]:50PVDF (red). Details of the peaks are magnified and numbered.

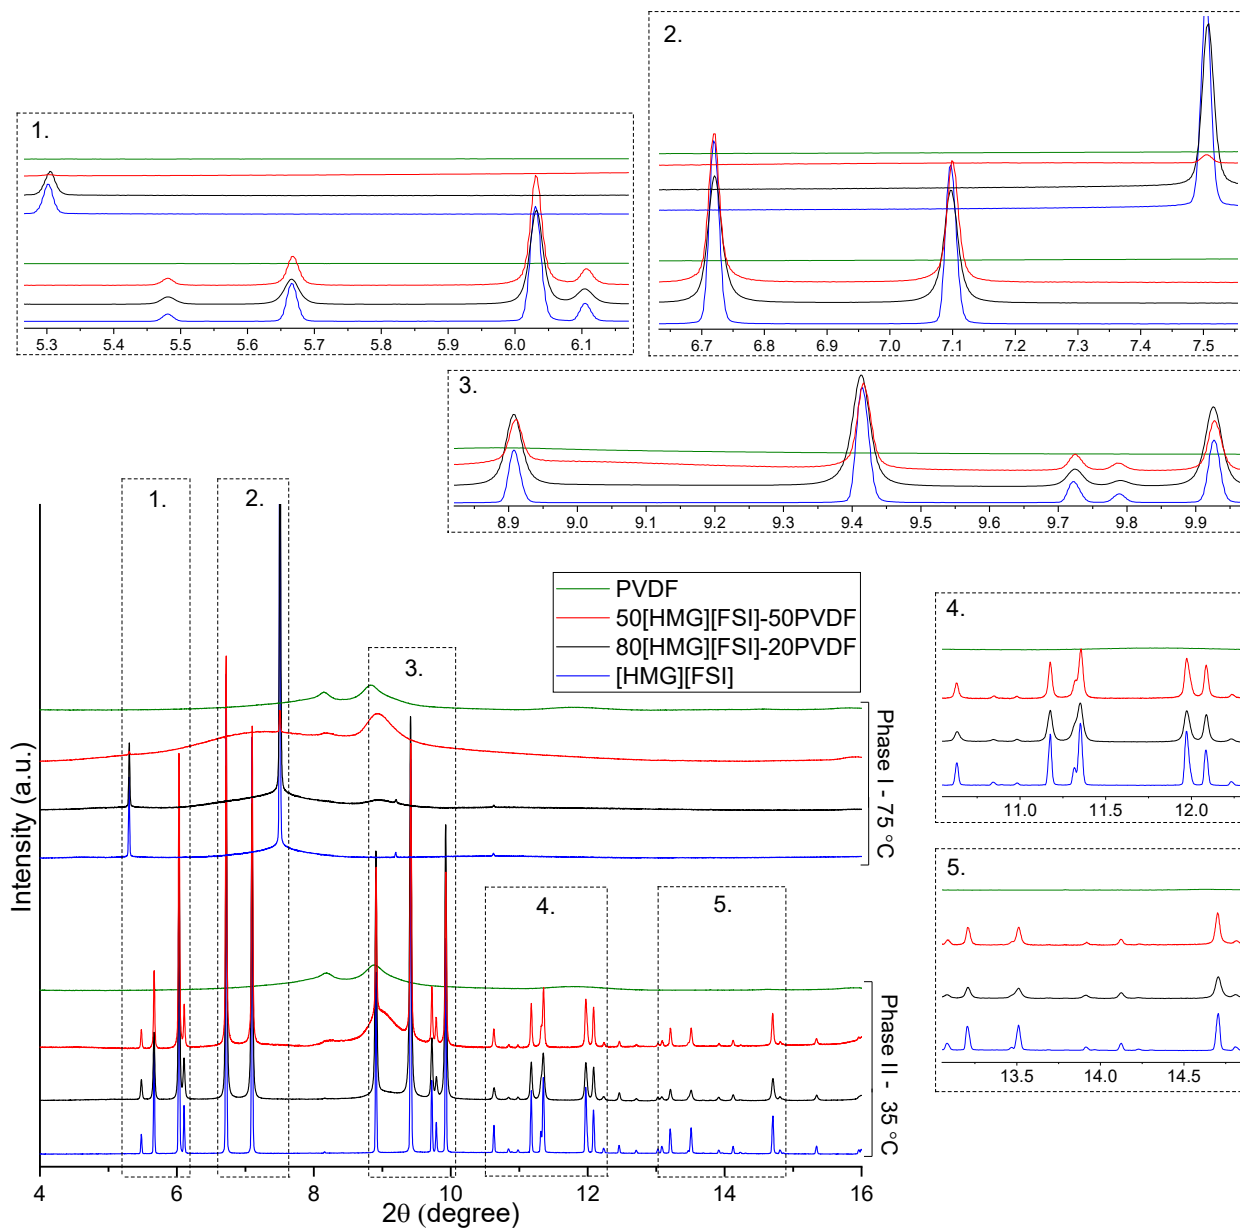

**Figure S3:** Synchrotron powder XRD patterns collected at 35 and 75 °C ( $\lambda = 0.6882361(4)$  Å) for neat [HMG][FSI] (blue), neat PVDF (green) and the composites 80[HMG][FSI]:20PVDF (black), and 50[HMG][FSI]:50PVDF (red). Details of the peaks are magnified and numbered.

## Line width (FWHMs) and Area fraction of narrow peak

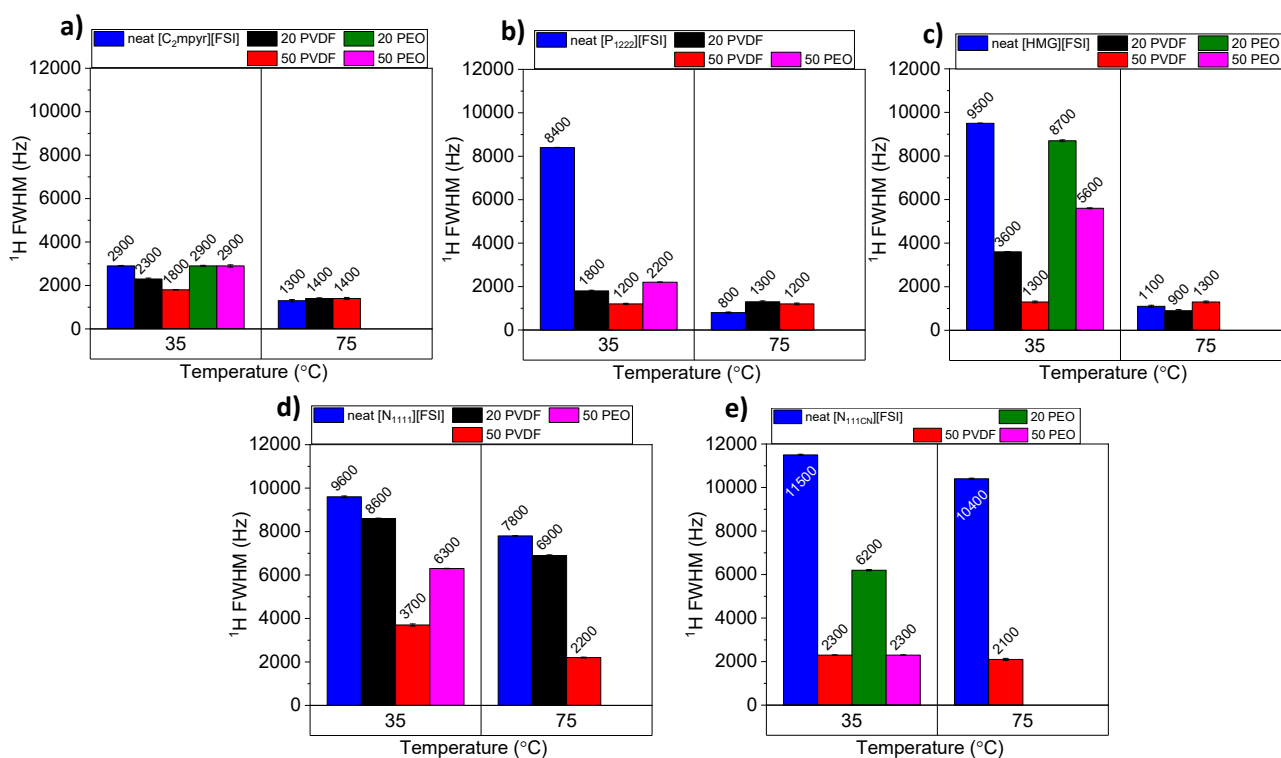

**Figure S4.**  $^1\text{H}$  Line full width at half-maximum (FWHMs) b) neat [P<sub>1222</sub>][FSI], c) neat [HMG][FSI], d) neat [N<sub>1111</sub>][FSI], e) neat [N<sub>111CN</sub>][FSI], and their corresponding PVDF and PEO composites.

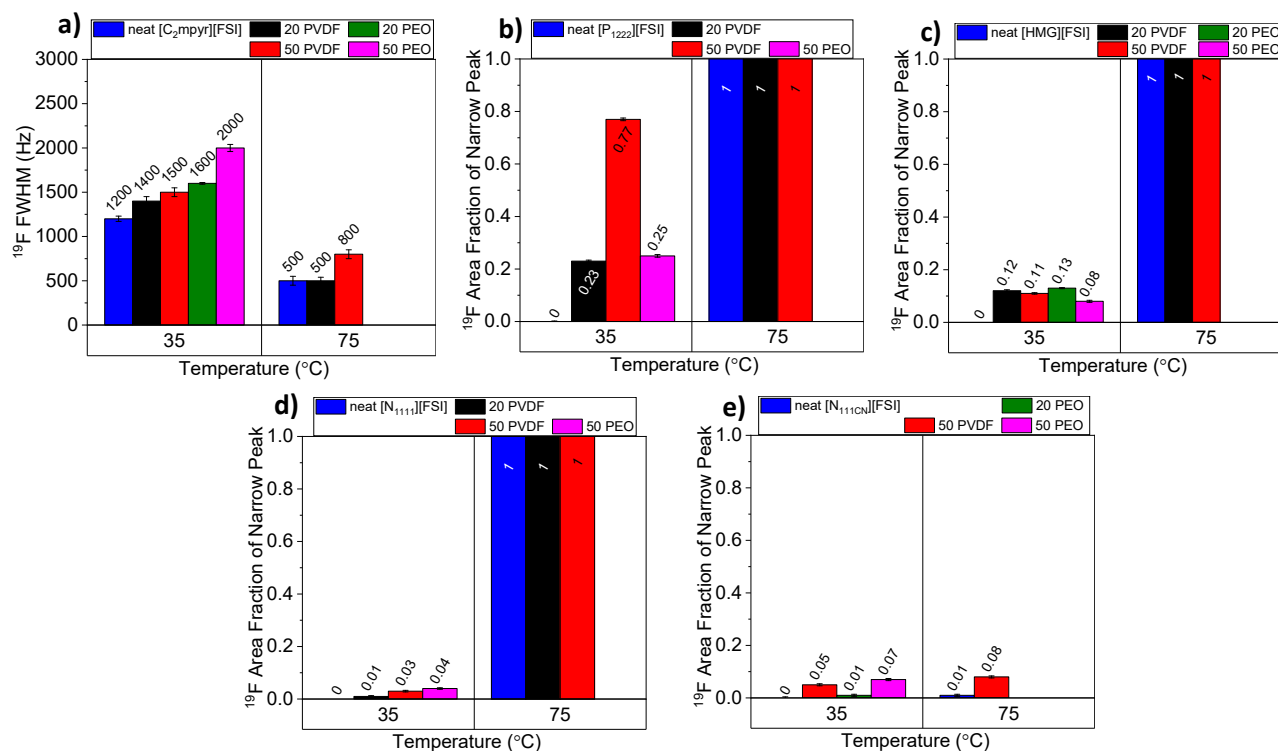

**Figure S5.** a)  $^{19}\text{F}$  Line full width at half-maximum (FWHMs) of neat [C<sub>2</sub>mpyr][FSI] and its PVDF and PEO composites.  $^{19}\text{F}$  Area Fraction of Narrow Peak of: b) neat [P<sub>1222</sub>][FSI], c) neat [HMG][FSI], d) neat [N<sub>1111</sub>][FSI], e) neat [N<sub>111CN</sub>][FSI], and their corresponding PVDF and PEO composites.

**Table S3.** Fitting parameters of the fluorine nuclei in the OIPCs. The parameters of the FSI anion were extracted from  $^{19}\text{F}$  NMR spectra of the pure OIPCs at  $35^\circ\text{C}$  by iterative fitting to a simulated CSA pattern and gauss/Lorentzian line shape function using the DMfit software.

| OIPC                       | Model            | Chemical shift (ppm) | Relative Intensity | $\delta(\text{CSA})$ | $\eta(\text{CSA})$ |
|----------------------------|------------------|----------------------|--------------------|----------------------|--------------------|
| [C <sub>2</sub> mpyr][FSI] | gauss/Lorentzian | 95.6                 | 1                  | -                    | -                  |
| [HMG][FSI]                 | CSA              | 95.8                 | 1                  | -73.51               | 0.99               |
| [P <sub>1222</sub> ][FSI]  | gauss/Lorentzian | 95.6                 | 0.01               | -                    | -                  |
|                            | CSA              | 94.2                 | 0.99               | 49.5                 | 0.14               |
| [N <sub>1111</sub> ][FSI]  | CSA              | 91.5                 | 1                  | -129                 | 0.46               |
| [N <sub>111CN</sub> ][FSI] | gauss/Lorentzian | 93.9                 | 0.00               | -                    | -                  |
|                            | CSA              | 94.3                 | 0.1                | 78.85                | 0.26               |

Surprisingly, the [FSI]<sup>-</sup> anions exhibit very different CSA pattern shapes depending on the OIPC cation. The CSA line shapes are quantified by parameters including the asymmetry parameter ( $\eta$ ) which indicates how much the environment around the fluorine nucleus deviates from axial symmetry and takes values between 0 and 1.<sup>1</sup> The shape of the [P<sub>1222</sub>][FSI] CSA pattern presents a CSA asymmetry parameter ( $\eta$ ) near zero ( $\sim 0.14$ ) and suggests that fluorine atoms have an axially symmetry in the [FSI] anion. The value of  $\eta$  increases, [N<sub>111CN</sub>][FSI] < [N<sub>1111</sub>][FSI] < [HMG][FSI], and indicates a deviation of the axially symmetry of the fluorine in these OIPCs (Figure 9)(Table S3). These differences are a result of the symmetry, size and packing of cations that surround them.

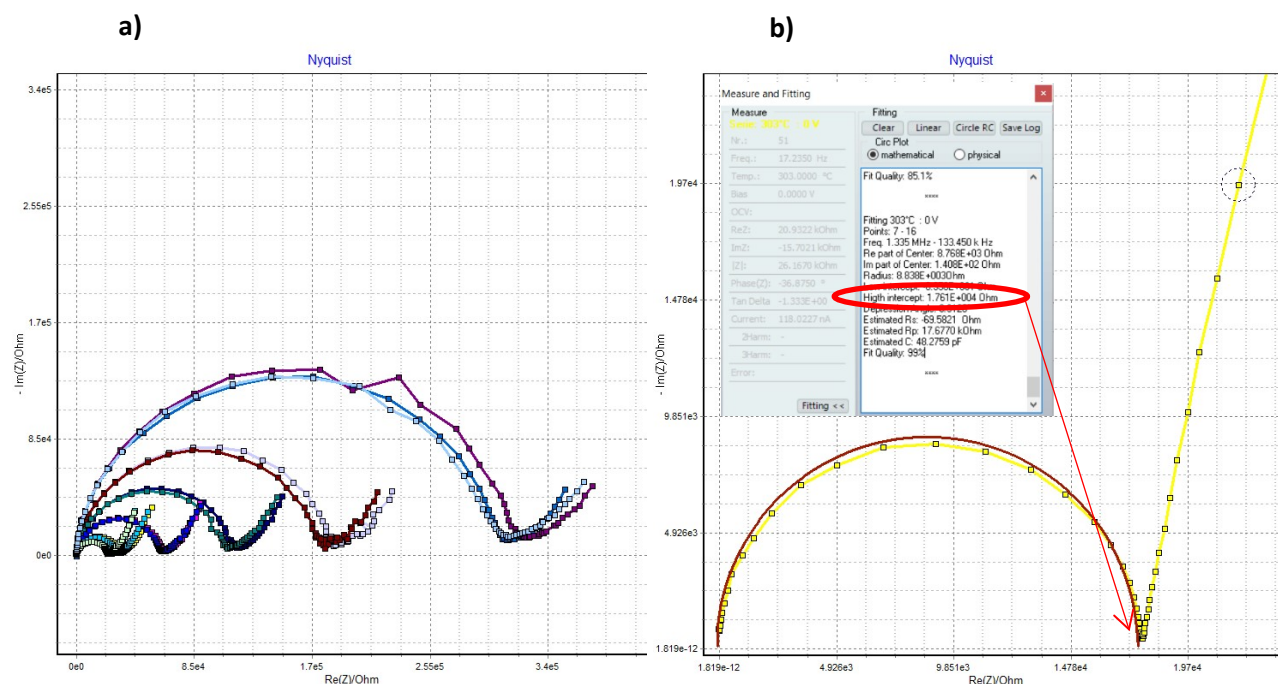

### Electrochemical impedance spectroscopy (EIS)

**Figure S6.** a) Example of Nyquist plot acquisition over a temperature range in neat [HMG][FSI] pellet. b) Example of Nyquist plot fitting to obtain resistance value of 50[C<sub>2</sub>mpyr][FSI]:50PVDF.

## References SI

- [1] H. W. Spiess, in *Dynamic NMR Spectroscopy* (Eds.: A. Steigel, H. W. Spiess), Springer Berlin Heidelberg, Berlin, Heidelberg, **1978**, pp. 55-214.
